# Supplementary material for: Inhibitory effects of cranberry polyphenol and volatile extracts on nitric oxide production in LPS activated RAW 264.7 macrophages
Source: Royal Society of Chemistry journal article supplement (doi:10.1039/c9fo01500k), 2019-01-01
Supplement: c9fo01500k1.pdf [file c9fo01500k1.pdf]

**Table S1** Retention times,  $\lambda_{\max}$ ,  $m/z$  values of  $[M+H]^+$  and fragment ions of anthocyanins in the phenolic fraction isolated from cranberries

| Peak # | Retention time (min) | $\lambda_{\max}$ (nm) | $[M+H]^+$ | Fragments | Identification         |
|--------|----------------------|-----------------------|-----------|-----------|------------------------|
| 1      | 31.1                 | 514,279               | 449       | 287       | Cyanidin 3-galactoside |
| 2      | 32.8                 | 518,280               | 449       | 287       | Cyanidin 3-glucoside   |
| 3      | 34.1                 | 518,280               | 419       | 287       | Cyanidin 3-arabinoside |
| 4      | 35.6                 | 519,279               | 463       | 301       | Peonidin 3-galactoside |
| 5      | 37.2                 | 517,279               | 463       | 301       | Peonidin 3-glucoside   |
| 6      | 37.3                 | 527,277               | 493       | 331       | Malvidin 3-galactoside |
| 7      | 38.7                 | 519,279               | 433       | 301       | Peonidin 3-arabinoside |

**Table S2** Retention times,  $\lambda_{\max}$ ,  $m/z$  values of [M-H]<sup>-</sup> and fragment ions of flavonols in the cranberry phenolic fraction.

| Peak # | Retention time (min) | $\lambda_{\max}$ (nm) | [M-H] <sup>-</sup> | Fragments | Identification                   |
|--------|----------------------|-----------------------|--------------------|-----------|----------------------------------|
| 1      | 30.12                | 259, 357              | 479                | 317       | Myricetin 3-galactoside          |
| 2      | 31.59                | 258, 360              | 449                | 317       | Myricetin 3-xyloside             |
| 3      | 34.09                | 257, 356              | 449                | 317       | Myricetin 3-arabinoside          |
| 4      | 35.31                | 256, 354              | 463                | 301       | Quercetin 3-galactoside          |
| 5      | 35.87                | 254, 360              | 463                | 301       | Quercetin 3-glucoside            |
| 6      | 37.77                | 256, 357              | 433                | 301       | Quercetin 3-xyloside             |
| 7      | 38.86                | 256, 357              | 433                | 301       | Quercetin 3-arabinopyranoside    |
| 8      | 40.07                | 256, 353              | 433                | 301       | Quercetin 3-arabinofuranoside    |
| 9      | 40.91                | 256, 350              | 447                | 301       | Quercetin 3-rhamnoside           |
| 10     | 41.45                | 255, 355              | 477                | 315       | 3-methoxyquercetin-3-pentoside   |
| 11     | 42.62                | 255, 359              | 609                | 301       | Quercetin 3-coumaroylgalactoside |
| 12     | 56.21                | 257, 360              | 567                | 301       | Quercetin 3-benzoylgalactoside   |
